# Supplementary figures and images for: Multimodal Diabetes Empowerment for Older Adults with Diabetes
Source: MDPI journal article supplement (doi:10.3390/ijerph191811299), 2022-09-08

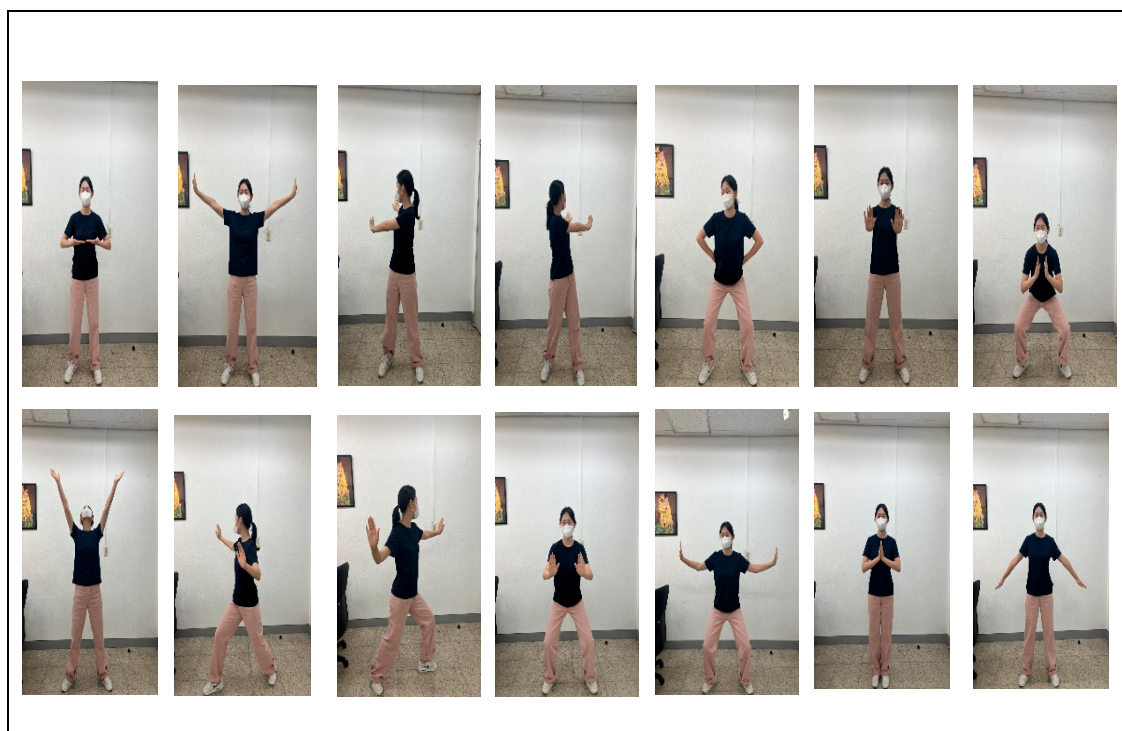

Figure S1: The pictures of BeHaS exercise of this Dia-Empower program

Supplement: s1 [file s1]
